# Supplementary material
Source: PubMed Central journal article supplement (PMC2692356)
Supplement: NIHMS113483-supplement-1.pdf [file NIHMS113483-supplement-1.pdf]

A

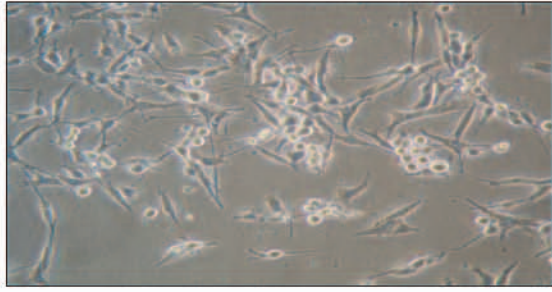

B

M14 parental cells

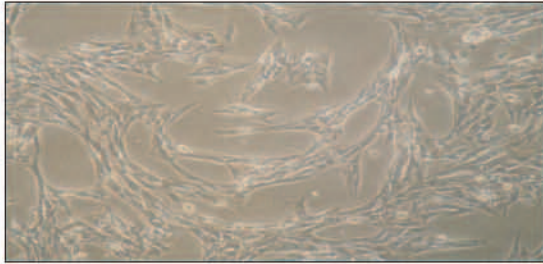

M14BRR2

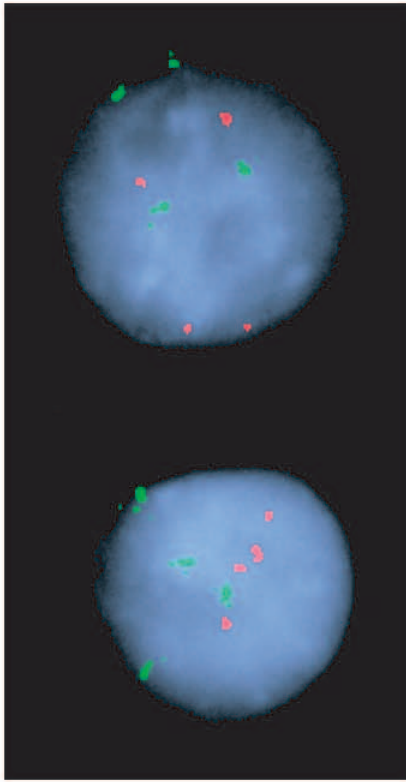

M14

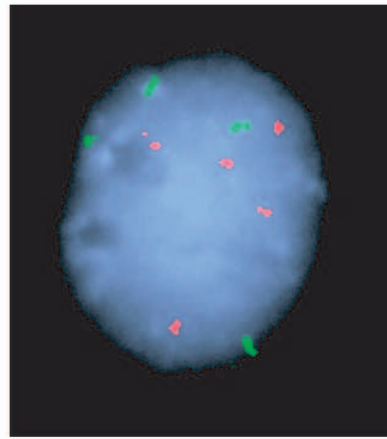

M14BRR2

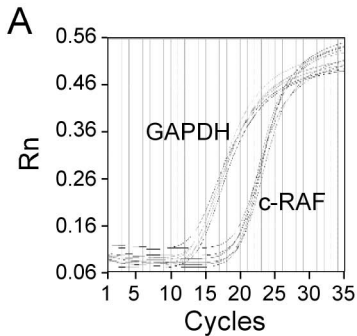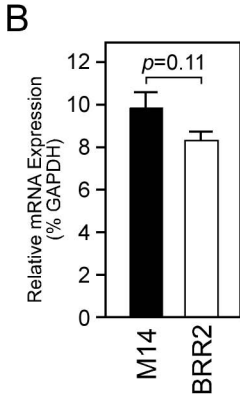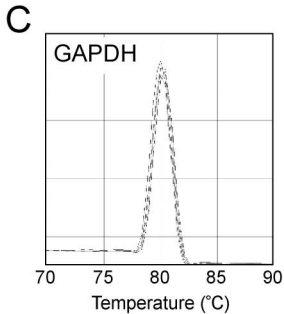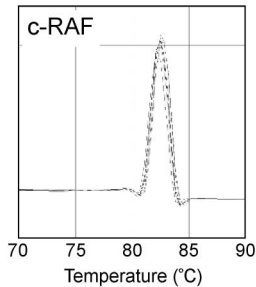

Table 1. BRAF sequencing primers

| Exon  | Forward                                              | Reverse                                                 |
|-------|------------------------------------------------------|---------------------------------------------------------|
| 1*    | CGTCACGACCGTGACACGCGGGTG<br>CGTCACGACCGTGACACGCGGGTG | CGTAGGAAGGCGCTGCATGACGGAG<br>GAAGGCGCTGCATGACGGAGAGGGAC |
| 2     | CTGGCAGTTACTGTGATGTAGTTG                             | CTTCCCAAATCTATTCCCTAATCCCACC                            |
| 3     | GGACCATCTAGATATCACATATG                              | CATTCTGTATGACATGGATGCCTC                                |
| 4     | GTAGAAATGGTGTGTATCTGACC                              | GATCAAAGTAACAAACCCTACAGTC                               |
| 5     | CGATGGAATATTAGGGAGCCAAACC                            | CTAAACAAATGTTGGCCTCTAGG                                 |
| 6     | GTTGTCAAGCTTGAAATCAGTTGC                             | CTGTATAGCTGAACCAGCATTAC                                 |
| 7     | CTGAGAATGGAATTTGATCTC                                | GCATGTCACTGAAGAGCAGAAGTC                                |
| 8     | CTTGAGCAAAGCAGCTTTGGC                                | CAGAAGCTTTTCTGATTTGTGATTG                               |
| 9     | GTGTCCACTTGTCTTATCATTGAGC                            | GTTTCTCTACACATTTTTCTCTGTG                               |
| 10    | GTATGTGTCTATGTCTATCATC                               | GAATTCTGTGTCCACATATGGAC                                 |
| 11    | CTCTTCCTGTATCCCTCTCAGGC                              | GGTAGGAGTCCCGACTGCTGTGAAC                               |
| 12    | CTAGTACAGGAATATCATTGTTAG                             | CTATCAGCCATACCATATAACATTGC                              |
| 13    | GTAGGAGGTTAGACTTGGCAATTGC                            | GTTAGCATCCTTATGTTCCCTGGAC                               |
| 14    | CTTGACTGGAGTGAAAGGTTTG                               | CAGGCTGTGGTATCCTGCTCTCC                                 |
| 15**  | GACTCTAAGAGGAAAGATGAAGTAC                            | GTTGAGACCTTCAATGACTTTCTAG                               |
| 16    | CTGTCTCTTTCTGAGTATGTAG                               | CTATCCTTCACGCTTACCCAGGAG                                |
| 17**  | GTGGGTTTCCCACCATCTATGATG                             | GAGTCTGCACATAGAATCCAAACTC                               |
| 18*** | GATTCAGGTGCTTTCTTGTAAGTG                             | CCACACAAGTGTTCTTTGGTTC                                  |
